# Supplementary material for: V2O5–Conductive polymer nanocables with built-in local electric field derived from interfacial oxygen vacancies for high energy density supercapacitors
Source: Royal Society of Chemistry journal article supplement (doi:10.1039/c9ta04264d), 2019-01-01
Supplement: c9ta04264d1.pdf [file c9ta04264d1.pdf]

## Supporting Information

### **V<sub>2</sub>O<sub>5</sub>/Conductive Polymer Nanocables with Build-in Local Electric Field Derived from Interface Oxygen Vacancies for High Energy Density Supercapacitors**

*Wenchao Bi*<sup>a, b</sup>, *Juanjuan Huang*<sup>b, c</sup>, *Mingshan Wang*<sup>b, d</sup>, *Evan P. Jahrman*<sup>e</sup>, *Gerald T. Seidler*<sup>e</sup>,

*Jichao Wang*<sup>a</sup>, *Yingjie Wu*<sup>f</sup>, *Guohua Gao*<sup>a\*</sup>, *Guangming Wu*<sup>a\*</sup>, *Guozhong Cao*<sup>b\*</sup>

<sup>a</sup> Shanghai Key Laboratory of Special Artificial Microstructure Materials and Technology, School of Physics Science and Engineering, Tongji University, Shanghai 200092, China.

<sup>b</sup> Department of Materials Science and Engineering, University of Washington, Seattle, WA 98195-2120, United States.

<sup>c</sup> MOE Key Laboratory for Magnetism and Magnetic Materials, School of Physical Science and Technology, Lanzhou University, Lanzhou 730000, China.

<sup>d</sup> The Center of New Energy Materials and Technology, School of Materials Science and Engineering, Southwest Petroleum University, Chengdu, Sichuan 610500, PR China

<sup>e</sup> Department of Physics, University of Washington, Seattle, WA 98195-1560, United States.

<sup>f</sup> Department of Material Science and Engineering, Monash University, Clayton, Victoria 3800, Australia

\*Email: [gao@tongji.edu.cn](mailto:gao@tongji.edu.cn) (G.G);

\*Email: [wugm@tongji.edu.cn](mailto:wugm@tongji.edu.cn) (G.W);

\*Email: [gzcao@u.washington.edu](mailto:gzcao@u.washington.edu) (G.C)

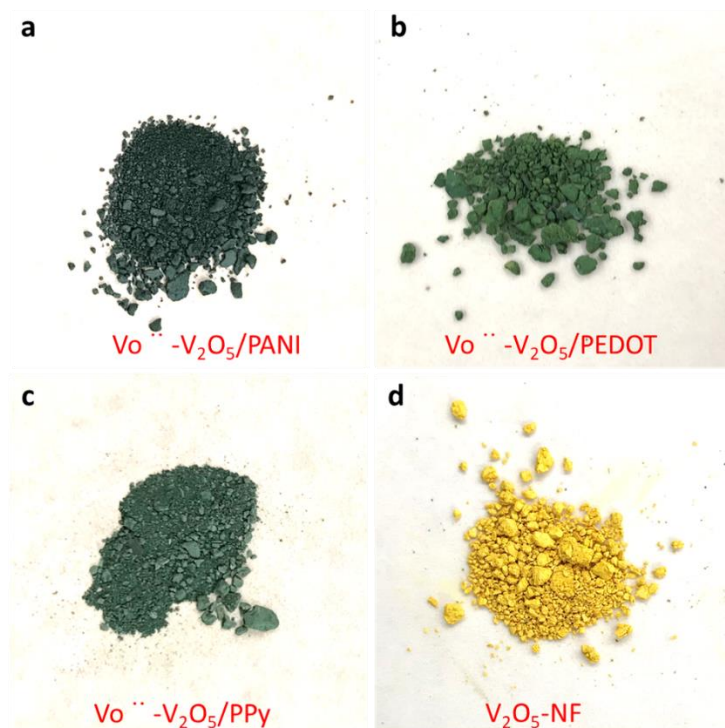

**Figure S1.** The digital images of  $\text{Vo}^{2+}\text{-V}_2\text{O}_5/\text{CP}$  nanocables and  $\text{V}_2\text{O}_5\text{-NF}$ .

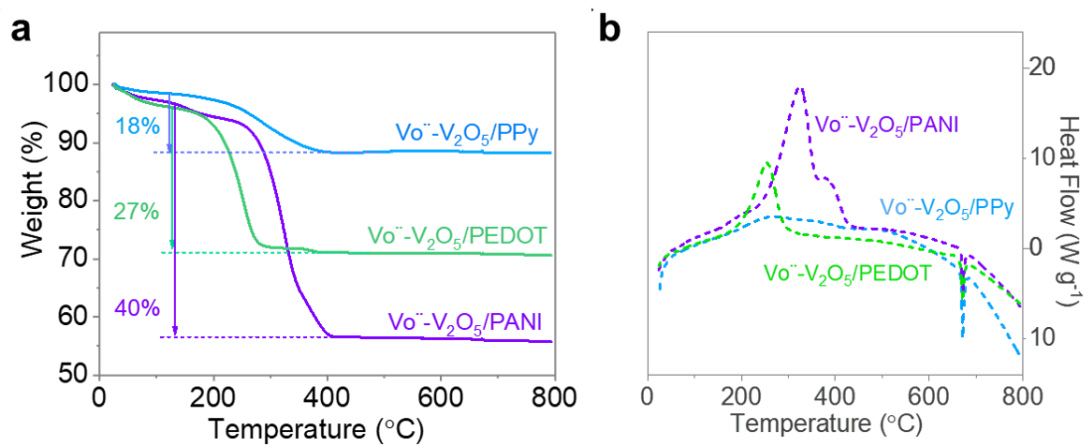

**Figure S2.** The TG-DSC curves of all  $\text{Vo}^{2+}\text{-V}_2\text{O}_5/\text{CP}$  nanocables.

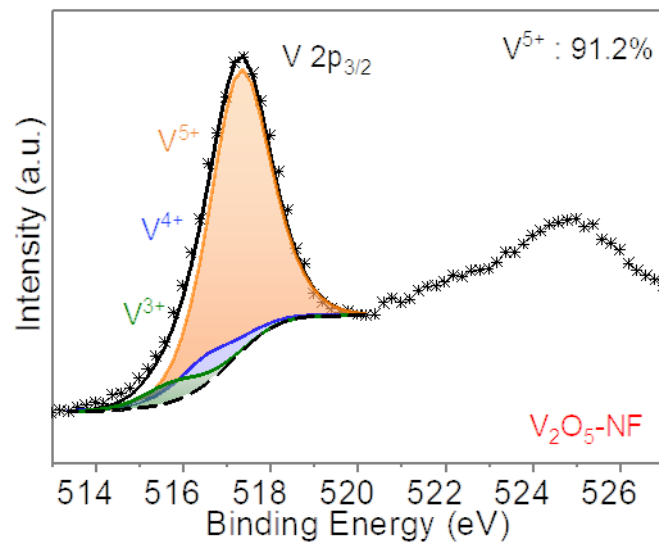

**Figure S3.** The XPS spectrum and corresponding decompositions of V 2p<sub>3/2</sub> peak of V<sub>2</sub>O<sub>5</sub>-NF.

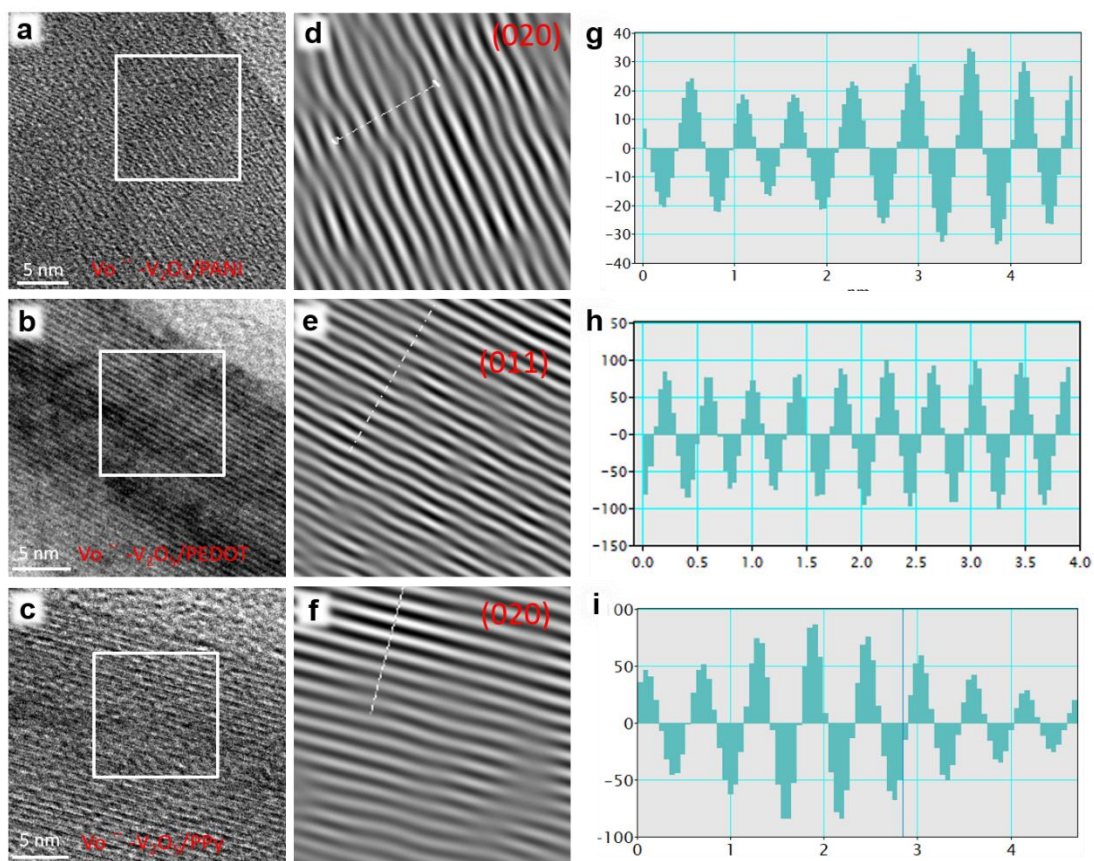

**Figure S4.** (a, b, c) HRTEM images of  $\text{Vo}^{\bullet}\text{-V}_2\text{O}_5/\text{PANI}$ ,  $\text{Vo}^{\bullet}\text{-V}_2\text{O}_5/\text{PEDOT}$  and  $\text{Vo}^{\bullet}\text{-V}_2\text{O}_5/\text{PPy}$ . (d, e, f) IFFT patterns of selected areas in HRTEM. The  $\text{Vo}^{\bullet}$ -caused dislocations can be easily observed. (e, f) Linear profiles obtained from the white lines in corresponding IFFT images, respectively. The interlayer spaces are expanded due to  $\text{Vo}^{\bullet}$ .

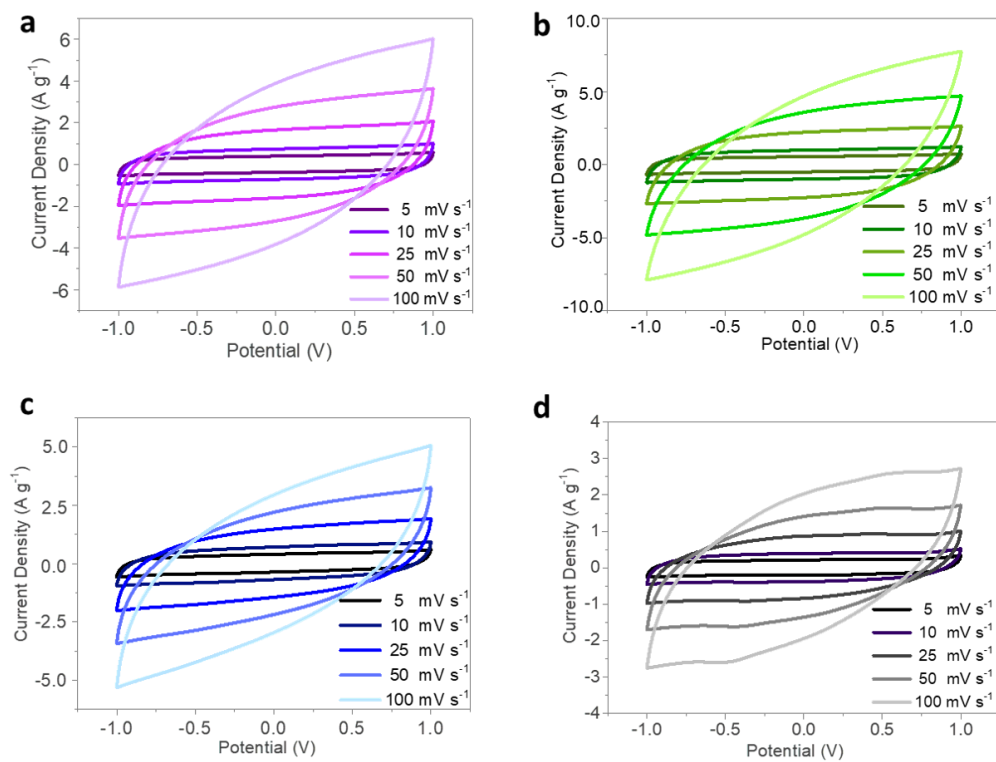

**Figure S5.** The CV curves of  $\text{Vo}^{\bullet\bullet}\text{-V}_2\text{O}_5/\text{PANI}$ ,  $\text{Vo}^{\bullet\bullet}\text{-V}_2\text{O}_5/\text{PEDOT}$ ,  $\text{Vo}^{\bullet\bullet}\text{-V}_2\text{O}_5/\text{PPy}$  and  $\text{V}_2\text{O}_5\text{-NF}$ .

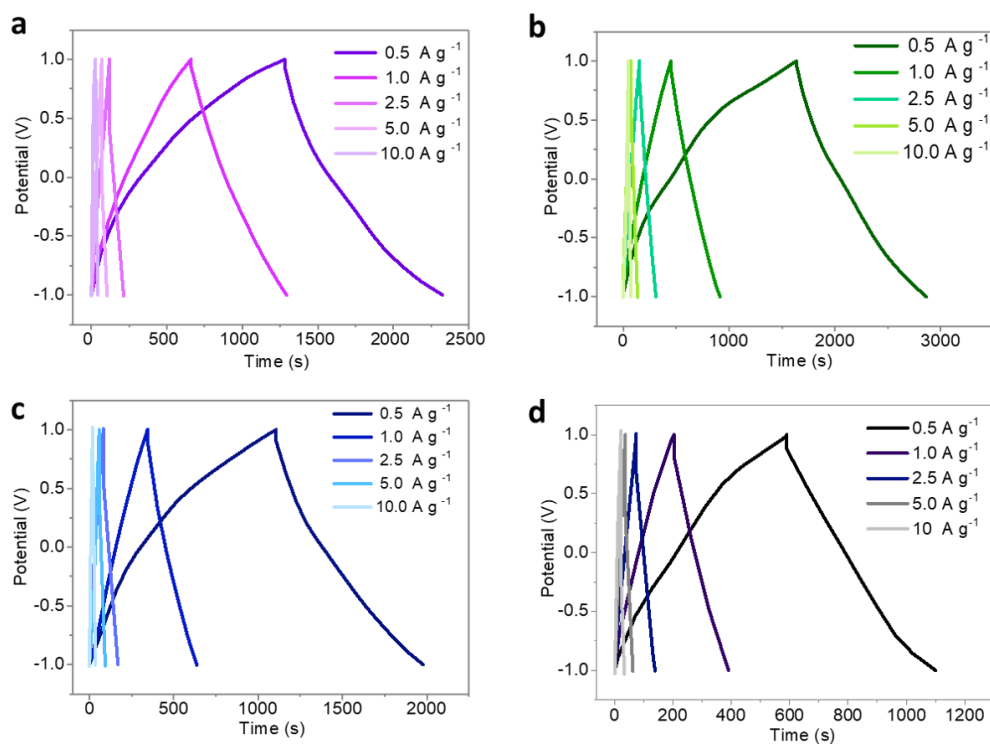

**Figure S6.** The GCD curves of (a) Vo<sup>2+</sup>-V<sub>2</sub>O<sub>5</sub>/PANI, (b) Vo<sup>2+</sup>-V<sub>2</sub>O<sub>5</sub>/PEDOT, (c) Vo<sup>2+</sup>-V<sub>2</sub>O<sub>5</sub>/PPy and (d) V<sub>2</sub>O<sub>5</sub>-NF.

|                                                                    | Vo <sup>••</sup> -V <sub>2</sub> O <sub>5</sub> /PEDOT | Vo <sup>••</sup> -V <sub>2</sub> O <sub>5</sub> /PANI | Vo <sup>••</sup> -V <sub>2</sub> O <sub>5</sub> /PPy | V <sub>2</sub> O <sub>5</sub> -NF |
|--------------------------------------------------------------------|--------------------------------------------------------|-------------------------------------------------------|------------------------------------------------------|-----------------------------------|
| R <sub>s</sub> (Ω)                                                 | 0.5                                                    | 0.6                                                   | 0.5                                                  | 0.7                               |
| R <sub>ct</sub> (Ω)                                                | 2.3                                                    | 3.0                                                   | 5.9                                                  | 8.4                               |
| σ <sub>w</sub>                                                     | 14.45                                                  | 11.21                                                 | 10.11                                                | 7.45                              |
| D <sub>Na<sup>+</sup></sub> (10 <sup>-12</sup> cm <sup>2</sup> /s) | 9.54                                                   | 5.17                                                  | 4.12                                                 | 2.51                              |

**Table S1.** The R<sub>s</sub>, R<sub>ct</sub>, σ<sub>w</sub> and D<sub>Na<sup>+</sup></sub> values of Vo<sup>••</sup>-V<sub>2</sub>O<sub>5</sub>/PANI, Vo<sup>••</sup>-V<sub>2</sub>O<sub>5</sub>/PEDOT, Vo<sup>••</sup>-V<sub>2</sub>O<sub>5</sub>/PPy and V<sub>2</sub>O<sub>5</sub>-NF, which are obtained by ZsimpWin from EIS curves.

The Na<sup>+</sup> ion diffusion coefficient of the electrode materials is calculated from the low frequency regions of corresponding EIS plots based on the following equation.

$$D_{Na^+} = \frac{R^2 T^2}{2 A^2 n^4 F^4 C^2 \sigma_w^2}$$

F is 96500 C·mol<sup>-1</sup>) is the Faraday constant;

R (8.314 J·mol<sup>-1</sup>·K<sup>-1</sup>) is gas constant;

T(298 K) is the absolute temperature;

A (cm<sup>2</sup>) is the surface area of the electrode;

C (mol·cm<sup>-3</sup>) is concentration of Na<sup>+</sup> ion in the electrolyte;

n is the number of electrons transferred per molecule;

σ<sub>w</sub> is Warburg coefficient which is obtained by ZsimpWin software.



|                        | V <sup>o</sup> -V <sub>2</sub> O <sub>5</sub> /PEDOT | V <sup>o</sup> -V <sub>2</sub> O <sub>5</sub> /PANI | V <sup>o</sup> -V <sub>2</sub> O <sub>5</sub> /PPy |
|------------------------|------------------------------------------------------|-----------------------------------------------------|----------------------------------------------------|
| $\sigma$ (S/cm)        | 300-500                                              | 0.1-5                                               | 10-50                                              |
| Coating thickness (nm) | 5.0                                                  | 6.7                                                 | 3.5                                                |
| $R$ ( $\Omega$ /nm)    | 17~28                                                | 1239~61941                                          | 247~1237                                           |

**Table S2.** The estimated  $R$  values of V<sup>o</sup>-V<sub>2</sub>O<sub>5</sub>/CPs.

In  $R = L/\sigma A$ ,  $A$  is cross sectional area of CP in a nanocable,  $\sigma$  is the Electrical conductivity and  $L$  is the length (nm). Here, the average diameter is estimated to be 35 nm according to the SEM and TEM images.

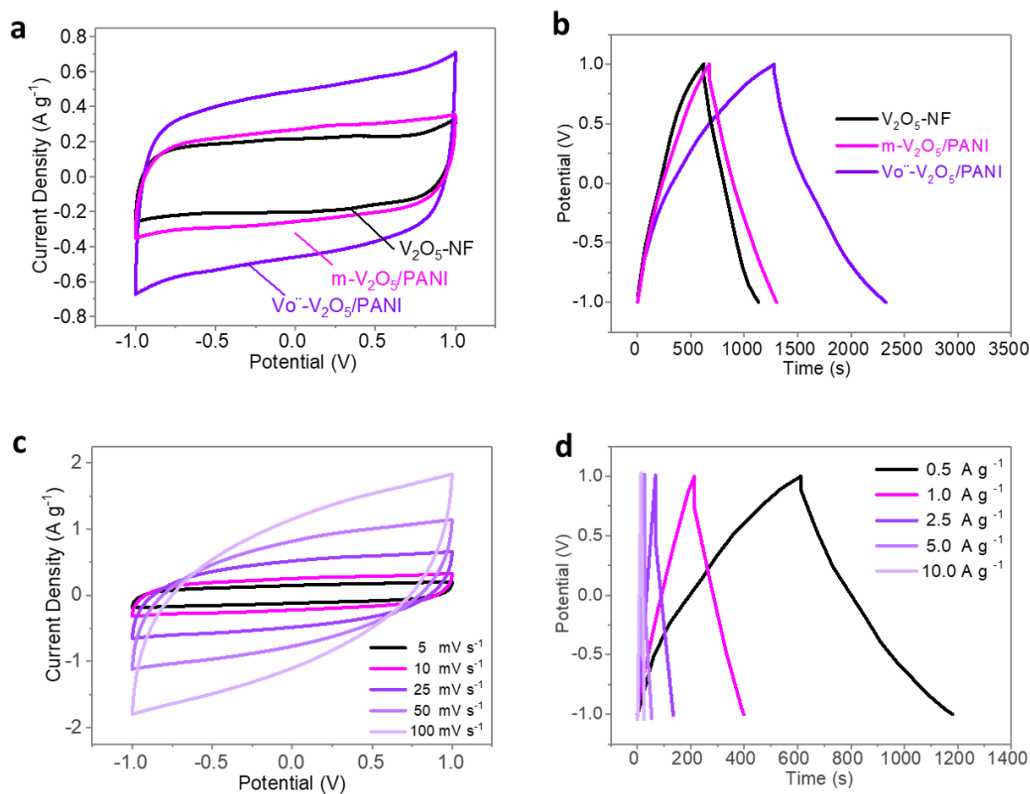

**Figure S7.** (a) The CV curves of  $Vo''-V_2O_5/PANI$ ,  $m-V_2O_5/PANI$  and  $V_2O_5$ -NF at  $5 \text{ mV s}^{-1}$ . (a) The GCD curves of  $Vo''-V_2O_5/PANI$ ,  $m-V_2O_5/PANI$  and  $V_2O_5$ -NF at  $0.5 \text{ A g}^{-1}$ . (c) The CV curves of  $m-V_2O_5/PANI$  at different scan rates. (d) The GCD curves of  $m-V_2O_5/PANI$  at different current densities.

Considering the CPs have similar function in our samples, and commercial PANI has the lowest price than PEDOT and PPy, which can be found on Sigma-Alorich company website, the synergistic effects of  $Vo''$  and CPs are explored by taking  $Vo''-V_2O_5/PANI$  for example.  $V_2O_5$ -NF and commercial PANI are mechanically mixed with the mass ratio from the TG results, noted as  $m-V_2O_5/PANI$ . All the electrochemical measurements are conducted under the same conditions. As shown above, the  $m-V_2O_5/PANI$  electrode shows a specific capacitance of  $280 \text{ F g}^{-1}$  at  $0.5 \text{ A g}^{-1}$ , which is smaller than that of  $Vo''-V_2O_5/PANI$  ( $523 \text{ F g}^{-1}$ ), larger than that of  $V_2O_5$ -NF ( $225 \text{ F g}^{-1}$ ). Thus, the excellent electrochemical performance of  $Vo''-V_2O_5/CPs$  is attributed to the synergistic effects of  $Vo''$  and CPs.

## References
